# Supplementary material for: Global aerosol modeling with MADE3 (v3.0) in EMAC (based on v2.53): model description and evaluation
Source: Copernicus journal article supplement (doi:10.5194/gmd-12-541-2019), 2019-02-01
Supplement: Supplementary file 1 [file gmd-12-541-2019-supplement.zip]

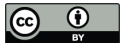

## *Supplement of*

# **Global aerosol modeling with MADE3 (v3.0) in EMAC (based on v2.53): model description and evaluation**

**J. Christopher Kaiser et al.**

*Correspondence to:* Mattia Righi ([mattia.righi@dlr.de](mailto:mattia.righi@dlr.de))

- [gmd-12-541-2019-supplement-title-page.pdf](#)
- [mecca.pdf](#)
- [nml](#)
  - [ECHAM5.nml](#)
  - [aeropt.nml](#)
  - [channel.nml](#)
  - [cloud.nml](#)
  - [cloudopt.nml](#)
  - [convect.nml](#)
  - [cvtrans.nml](#)
  - [ddep.nml](#)
  - [e5vdiff.nml](#)
  - [h2o.nml](#)
  - [import](#)
    - \* [ddep](#)
    - \* [made3](#)
    - \* [offemis](#)
    - \* [onemis](#)
    - \* [rad](#)
    - \* [tnudge](#)
  - [import.nml](#)
  - [jval.nml](#)
  - [lnox.nml](#)
  - [made3.nml](#)
  - [mecca.nml](#)

- offemis.nml
  - onemis.nml
  - orbit.nml
  - orogw.nml
  - qtimer.nml
  - rad.nml
  - scav.nml
  - sedi.nml
  - surface.nml
  - switch.nml
  - tendency.nml
  - timer.nml
  - tnudge.nml
  - tracer.nml
  - tropop.nml
- scav.pdf

The copyright of individual parts of the supplement might differ from the CC BY 4.0 License.
